# Supplementary material
Source: MDPI journal article supplement (https://www.mdpi.com/2297-8739/10/7/413)
Supplement: s1 [file s1]

## Supporting Information

### Diagnostic Strategies for Brain Doping in an Animal Model via Quantitative Analysis of Neurochemicals

Yoeseph Cho<sup>1,2,†</sup>, Seongeun Jeon<sup>1,†</sup>, Yejin Lee<sup>1</sup>, Hana Park<sup>1,3</sup>, Yinglan Xu<sup>1</sup>, Mijin Jeon<sup>1</sup>, Sunmi Jung<sup>1</sup>, Minyoung Kim<sup>1</sup>, Ahlim Chin<sup>1</sup>, Sang Sun Yoon<sup>2</sup>, Junghyun Son<sup>1,\*</sup>

<sup>1</sup>Doping Control Center, Korea Institute of Science and Technology, Seoul 02792, Republic of Korea

<sup>2</sup>Department of Microbiology and Immunology, Brain Korea 21 PLUS Project for Medical Science, Yonsei University College of Medicine, Seoul 03722, Republic of Korea

<sup>3</sup>Department of Biotechnology, Yonsei University College of Life Science and Biotechnology, Seoul 03722, Republic of Korea

<sup>†</sup>These authors contributed equally to this work.

\*Corresponding Author: Prof. Junghyun Son, Ph.D.

Doping Control Center

Korea Institute of Science and Technology

Hwarang-ro 14-gil 5, Seongbuk-gu, Seoul 02792, Republic of Korea

Tel: +82-2-958-5063

Fax: +82-2-958-6677

E-mail: [son.junghyun@kist.re.kr](mailto:son.junghyun@kist.re.kr)

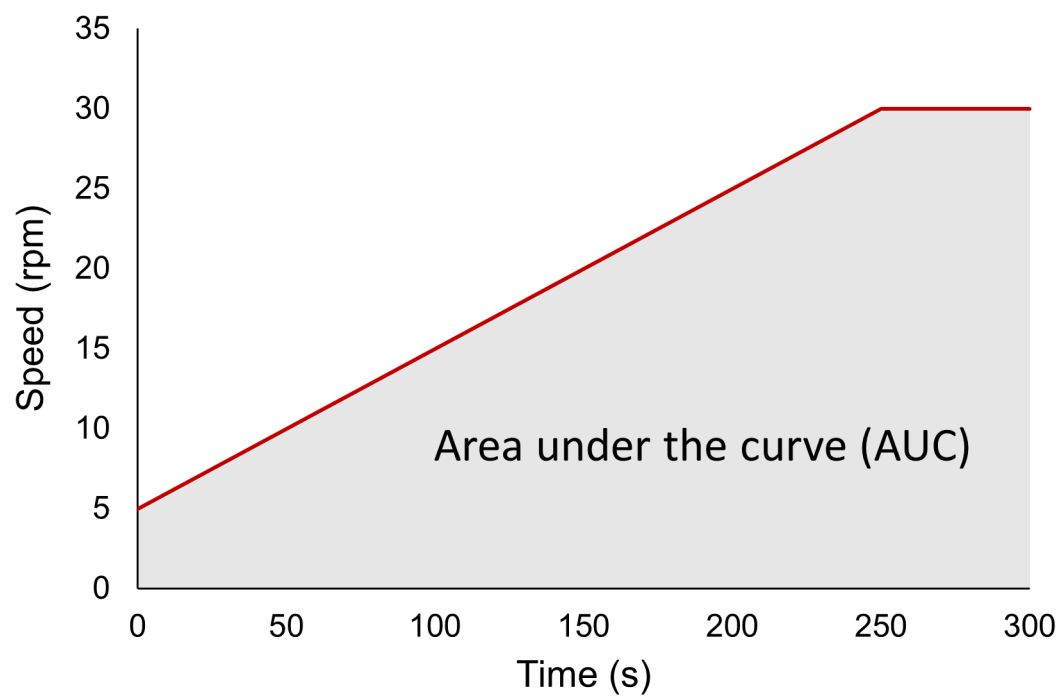

**Figure S1.** Conditions for behavioral testing using a rotarod. The speed was started at 4 rpm, increased to 300 rpm within 250 s, and then held constant until 300 s.

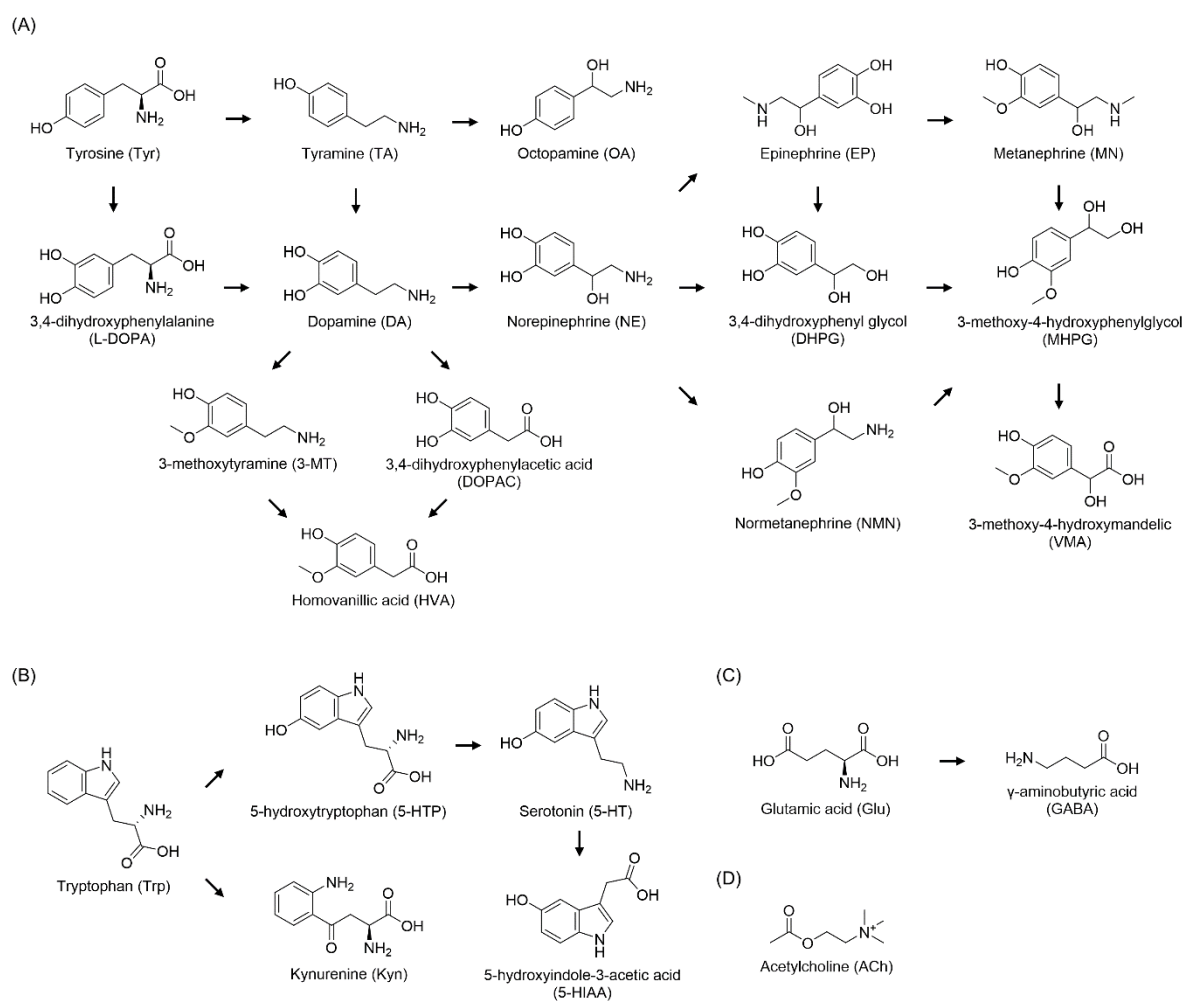

**Figure S2.** Metabolic pathways and chemical structures of the target neurochemicals used in this study: (A) catecholamine biosynthesis pathway; (B) tryptophan metabolic pathway; (C)  $\gamma$ -aminobutyric acid synthesis from glutamic acid; and (D) structure of acetylcholine.

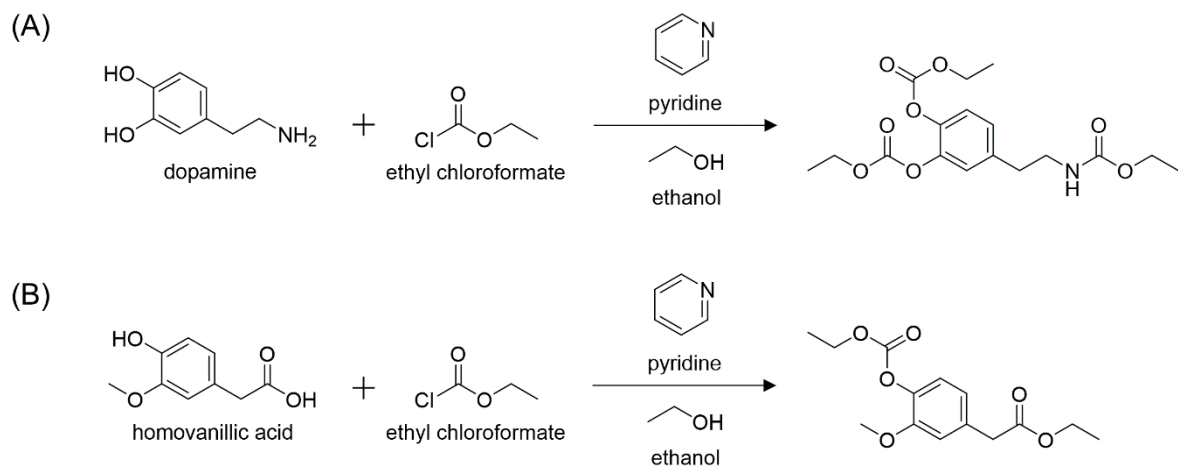

**Figure S3.** Derivatization reaction scheme of ethyl chloroformate with target substances: (A) dopamine; (B) homovanillic acid. The amino and hydroxyl groups in (A) are converted to a more stable structure by reacting with ethyl chloroformate. In the case of a carboxylic groups in (B), an additional reaction with alcohol transformed to the structure in which CO<sub>2</sub> removed.

**Table S1.** Latency to fall in the rotarod test for an animal model system

| Rat | Sham (0.0 mA stimulation) |     |           |     | 0.1 mA stimulation |     |           |     | 0.2 mA stimulation |     |           |     |
|-----|---------------------------|-----|-----------|-----|--------------------|-----|-----------|-----|--------------------|-----|-----------|-----|
|     | Before (s)                |     | After (s) |     | Before (s)         |     | After (s) |     | Before (s)         |     | After (s) |     |
|     | 1st                       | 2nd | 1st       | 2nd | 1st                | 2nd | 1st       | 2nd | 1st                | 2nd | 1st       | 2nd |
| 1   | 239                       | 190 | 269       | 270 | 220                | 229 | 246       | 248 | 181                | 233 | 207       | 182 |
| 2   | 246                       | 246 | 244       | 243 | 240                | 300 | 300       | 274 | 228                | 212 | 242       | 247 |
| 3   | 140                       | 221 | 157       | 183 | 105                | 230 | 184       | 224 | 201                | 237 | 215       | 141 |
| 4   | 255                       | 241 | 231       | 234 | 239                | 226 | 237       | 226 | 135                | 122 | 237       | 184 |
| 5   | 227                       | 142 | 206       | 189 | 238                | 252 | 239       | 291 | 247                | 249 | 266       | 246 |
| 6   | 237                       | 154 | 218       | 143 | 224                | 203 | 190       | 230 | 72                 | 88  | 60        | 92  |
| 7   | 20*                       | 26* | 30        | 21* | 98                 | 18* | 143       | 55  | 185                | 217 | 208       | 201 |
| 8   | 134                       | 225 | 160       | 108 | 184                | 166 | 198       | 170 | 22*                | 16* | 29*       | 18* |
| 9   | 177                       | 212 | 182       | 162 | 216                | 239 | 220       | 243 | 197                | 212 | 212       | 226 |
| 10  | 229                       | 229 | 225       | 227 | 76                 | 149 | 55        | 166 | 153                | 200 | 166       | 196 |

\*Subjects that fell off within 30 seconds

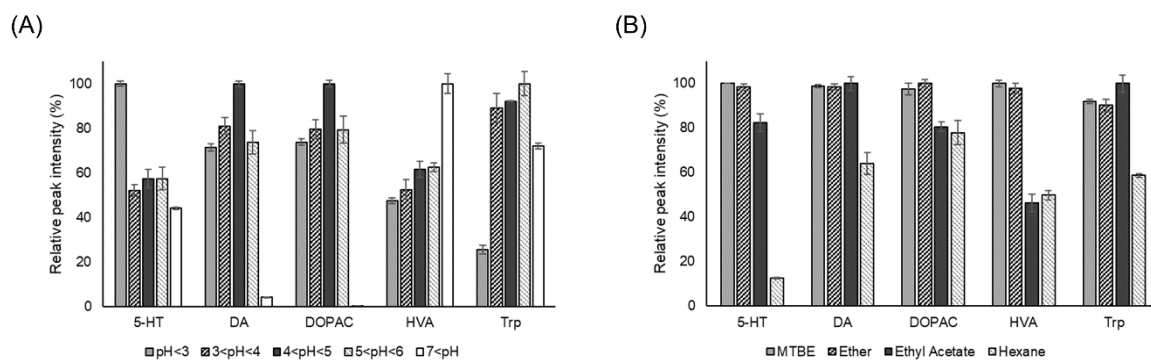

**Figure S4.** Optimization results of (A) pH condition and (B) extraction solvent in the sample preparation step. The conditions for obtaining the maximum value for each substance were set to 100%, and the average and standard deviation were indicated. The most stable pH conditions for derivatization were between 4 and 5, and the optimal solvent for the extraction of the derivatized target substances was MTBE.

**Table S2.** MRM conditions for the detection of derivatized target compounds

| Compounds | ESI polarity | Adducts                           | Precursor ion<br>( <i>m/z</i> ) | Product ion<br>( <i>m/z</i> ) | Collision energy<br>(eV) | Retention time<br>(min) |
|-----------|--------------|-----------------------------------|---------------------------------|-------------------------------|--------------------------|-------------------------|
| 3-MT      | +            | [M+NH <sub>4</sub> ] <sup>+</sup> | 329.2                           | 266                           | 14                       | 2.80                    |
| 3-MT      | +            | [M+H] <sup>+</sup>                | 312.1                           | 266                           | 10                       | 2.80                    |
| 5-HIAA    | +            | [M+NH <sub>4</sub> ] <sup>+</sup> | 309.1                           | 218                           | 17                       | 2.95                    |
| 5-HIAA    | +            | [M+H] <sup>+</sup>                | 292.1                           | 218                           | 14                       | 2.95                    |
| 5-HT      | +            | [M+H] <sup>+</sup>                | 321.1                           | 203                           | 17                       | 2.69                    |
| 5-HT      | +            | [M+NH <sub>4</sub> ] <sup>+</sup> | 338.2                           | 321                           | 8                        | 2.69                    |
| 5-HTP     | +            | [M+H] <sup>+</sup>                | 393.2                           | 347                           | 12                       | 3.02                    |
| 5-HTP     | +            | [M+NH <sub>4</sub> ] <sup>+</sup> | 410.2                           | 347                           | 16                       | 3.02                    |
| DA        | +            | [M+NH <sub>4</sub> ] <sup>+</sup> | 387.2                           | 370                           | 10                       | 3.17                    |
| DA        | +            | [M+H] <sup>+</sup>                | 370.1                           | 180                           | 18                       | 3.17                    |
| DHPG      | +            | [M+NH <sub>4</sub> ] <sup>+</sup> | 332.1                           | 153                           | 15                       | 2.15                    |
| DHPG      | +            | [M+NH <sub>4</sub> ] <sup>+</sup> | 404.2                           | 369                           | 10                       | 2.50                    |
| DOPAC     | +            | [M+NH <sub>4</sub> ] <sup>+</sup> | 358.1                           | 123                           | 28                       | 3.86                    |
| DOPAC     | +            | [M+H] <sup>+</sup>                | 341.1                           | 123                           | 24                       | 3.86                    |
| EP        | +            | [M+NH <sub>4</sub> ] <sup>+</sup> | 417.2                           | 382                           | 13                       | 2.79                    |
| EP        | +            | [M+H] <sup>+</sup>                | 400.2                           | 382                           | 10                       | 2.79                    |
| GABA      | +            | [M+H] <sup>+</sup>                | 204.1                           | 158                           | 10                       | 2.15                    |
| GABA      | +            | [M+H] <sup>+</sup>                | 204.1                           | 112                           | 16                       | 2.15                    |
| Glu       | +            | [M+H] <sup>+</sup>                | 276.1                           | 230                           | 10                       | 2.42                    |
| Glu       | +            | [M+H] <sup>+</sup>                | 276.1                           | 156                           | 16                       | 2.42                    |
| HVA       | +            | [M+NH <sub>4</sub> ] <sup>+</sup> | 300.1                           | 137                           | 20                       | 3.27                    |
| HVA       | +            | [M+H] <sup>+</sup>                | 283.1                           | 137                           | 14                       | 3.27                    |
| Kyn       | +            | [M+H] <sup>+</sup>                | 381.2                           | 246                           | 14                       | 3.77                    |
| Kyn       | +            | [M+NH <sub>4</sub> ] <sup>+</sup> | 398.2                           | 381                           | 8                        | 3.77                    |
| L-DOPA    | +            | [M+NH <sub>4</sub> ] <sup>+</sup> | 459.2                           | 442                           | 10                       | 3.79                    |
| L-DOPA    | +            | [M+H] <sup>+</sup>                | 442.2                           | 324                           | 14                       | 3.79                    |
| MHPG      | +            | [M+NH <sub>4</sub> ] <sup>+</sup> | 274.1                           | 167                           | 10                       | 1.99                    |
| MHPG      | +            | [M+NH <sub>4</sub> ] <sup>+</sup> | 346.1                           | 167                           | 14                       | 2.59                    |
| MN        | +            | [M+NH <sub>4</sub> ] <sup>+</sup> | 359.2                           | 324                           | 10                       | 2.47                    |
| MN        | +            | [M+H] <sup>+</sup>                | 342.2                           | 324                           | 10                       | 2.47                    |

**Table S2.** (continued)

| Compounds | ESI polarity | Adducts                           | Precursor ion<br>( <i>m/z</i> ) | Product ion<br>( <i>m/z</i> ) | Collision energy<br>(eV) | Retention time<br>(min) |
|-----------|--------------|-----------------------------------|---------------------------------|-------------------------------|--------------------------|-------------------------|
| NE        | +            | [M+NH <sub>4</sub> ] <sup>+</sup> | 475.2                           | 368                           | 10                       | 3.76                    |
| NE        | +            | [M+H] <sup>+</sup>                | 458.2                           | 368                           | 10                       | 3.76                    |
| NMN       | +            | [M+NH <sub>4</sub> ] <sup>+</sup> | 417.2                           | 310                           | 10                       | 3.23                    |
| OA        | +            | [M+NH <sub>4</sub> ] <sup>+</sup> | 315.1                           | 91                            | 37                       | 2.26                    |
| OA        | +            | [M+NH <sub>4</sub> ] <sup>+</sup> | 387.2                           | 280                           | 10                       | 3.22                    |
| TA        | +            | [M+NH <sub>4</sub> ] <sup>+</sup> | 299.1                           | 236                           | 13                       | 2.84                    |
| TA        | +            | [M+H] <sup>+</sup>                | 282.1                           | 236                           | 10                       | 2.84                    |
| Trp       | +            | [M+H] <sup>+</sup>                | 305.1                           | 231                           | 15                       | 2.85                    |
| Trp       | +            | [M+NH <sub>4</sub> ] <sup>+</sup> | 322.2                           | 305                           | 9                        | 2.85                    |
| Tyr       | +            | [M+H] <sup>+</sup>                | 354.2                           | 280                           | 13                       | 3.31                    |
| Tyr       | +            | [M+NH <sub>4</sub> ] <sup>+</sup> | 371.2                           | 354                           | 10                       | 3.31                    |
| VMA       | +            | [M+NH <sub>4</sub> ] <sup>+</sup> | 388.2                           | 209                           | 16                       | 4.05                    |
| ACh*      | +            | M <sup>+</sup>                    | 146.1                           | 87                            | 15                       | 0.43                    |
| d3-5-HTP  | +            | [M+H] <sup>+</sup>                | 396.2                           | 350                           | 12                       | 3.02                    |
| d3-5-HTP  | +            | [M+NH <sub>4</sub> ] <sup>+</sup> | 413.2                           | 350                           | 15                       | 3.02                    |
| d4-DA     | +            | [M+NH <sub>4</sub> ] <sup>+</sup> | 391.2                           | 374                           | 9                        | 3.16                    |
| d4-DA     | +            | [M+H] <sup>+</sup>                | 374.1                           | 184                           | 20                       | 3.16                    |
| d2-GABA   | +            | [M+H] <sup>+</sup>                | 206.1                           | 160                           | 10                       | 2.14                    |
| d2-GABA   | +            | [M+H] <sup>+</sup>                | 206.1                           | 114                           | 16                       | 2.14                    |
| d5-Glu    | +            | [M+H] <sup>+</sup>                | 281.1                           | 235                           | 10                       | 2.42                    |
| d5-Glu    | +            | [M+H] <sup>+</sup>                | 281.1                           | 132                           | 21                       | 2.42                    |
| d6-NE     | +            | [M+NH <sub>4</sub> ] <sup>+</sup> | 481.2                           | 374                           | 10                       | 3.75                    |
| d6-NE     | +            | [M+H] <sup>+</sup>                | 464.2                           | 374                           | 10                       | 3.75                    |
| d4-ACh*   | +            | M <sup>+</sup>                    | 150.1                           | 91                            | 15                       | 0.42                    |
| DHBA      | +            | [M+NH <sub>4</sub> ] <sup>+</sup> | 373.1                           | 356                           | 10                       | 3.00                    |
| DHBA      | +            | [M+H] <sup>+</sup>                | 356.1                           | 123                           | 24                       | 3.00                    |



(A)

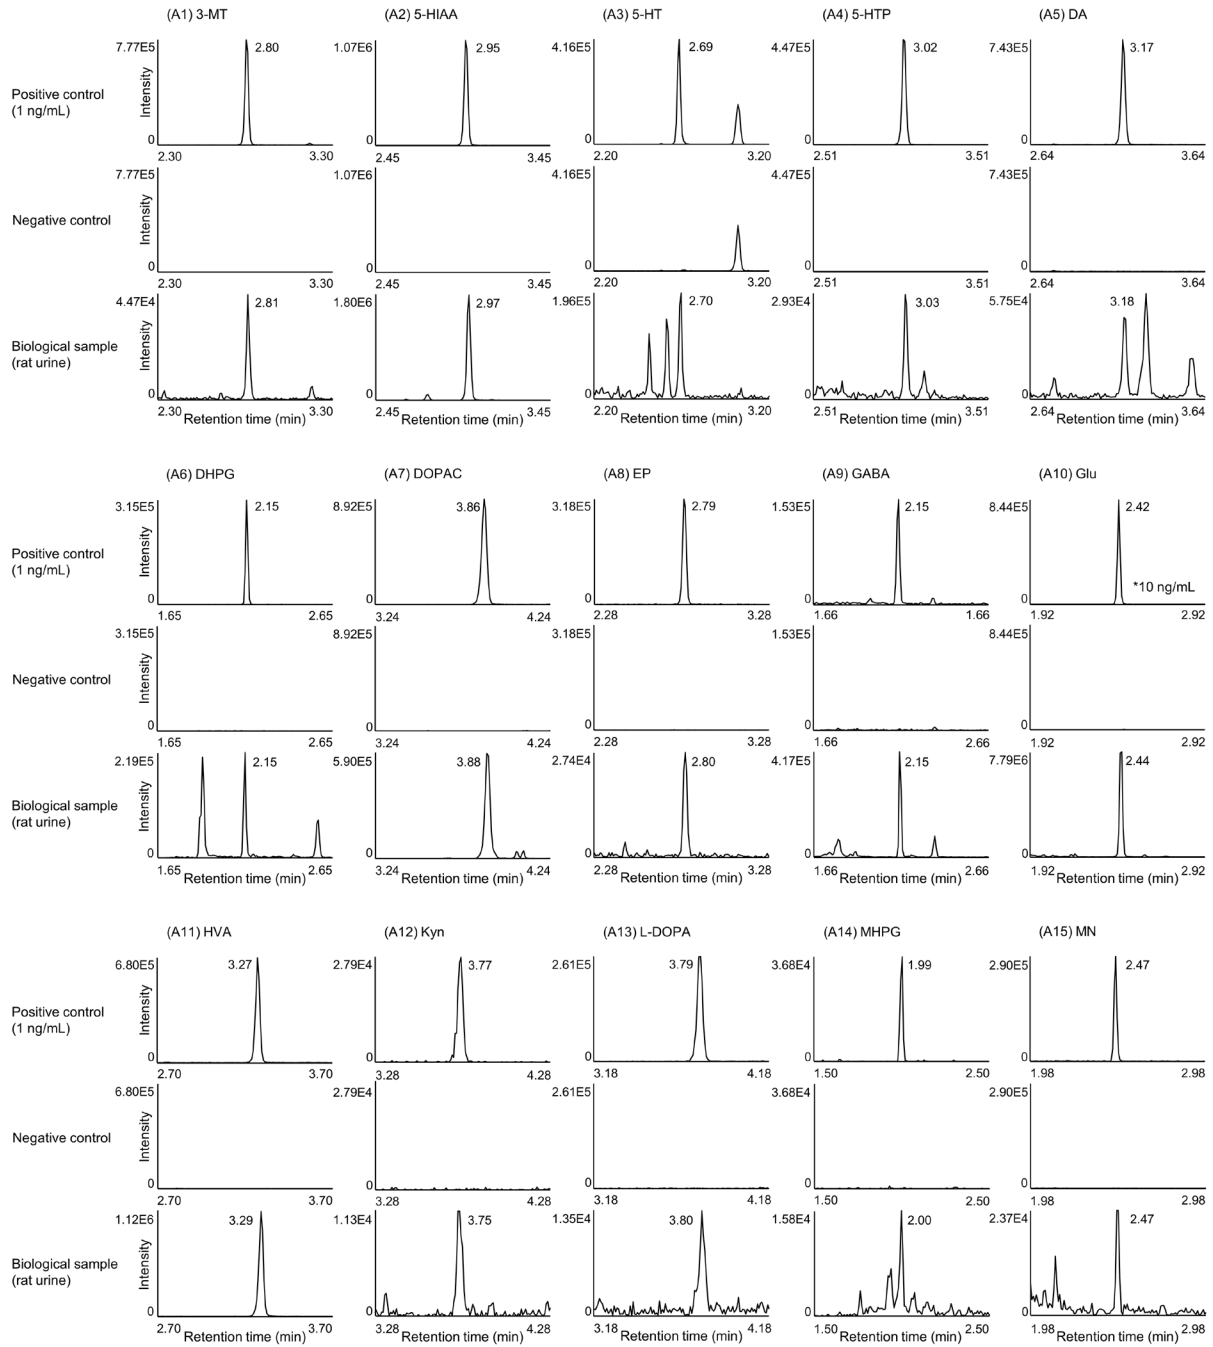

**Figure S5.** Chromatograms of 23 target compounds (A1-23) and 7 internal standards (B1-7) obtained by applying the developed method. For (A), the analysis results in positive and negative control and biological samples were depicted, whereas (B) illustrated the results of control samples only. According to the chromatograms of the control samples, no interference peaks were observed for any of the substances.

(A) continued

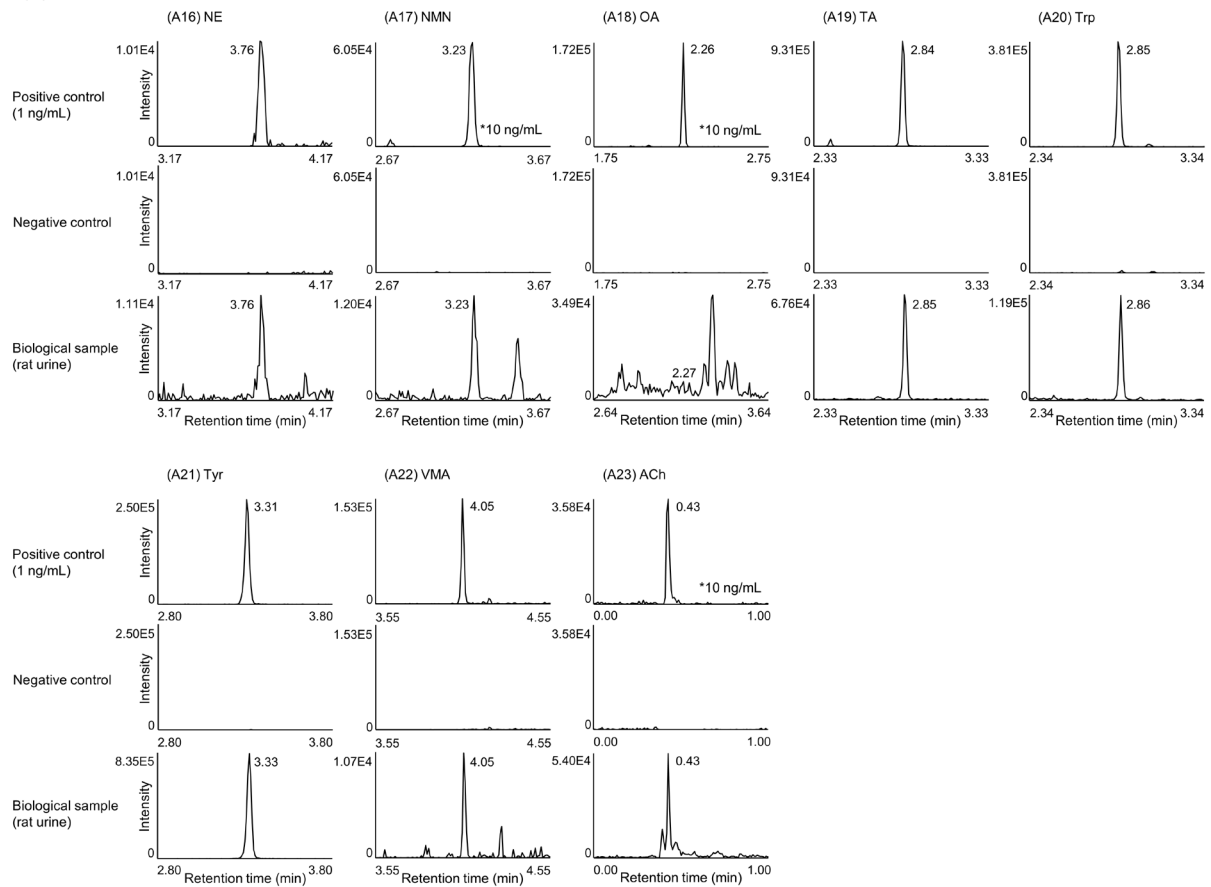

(B)

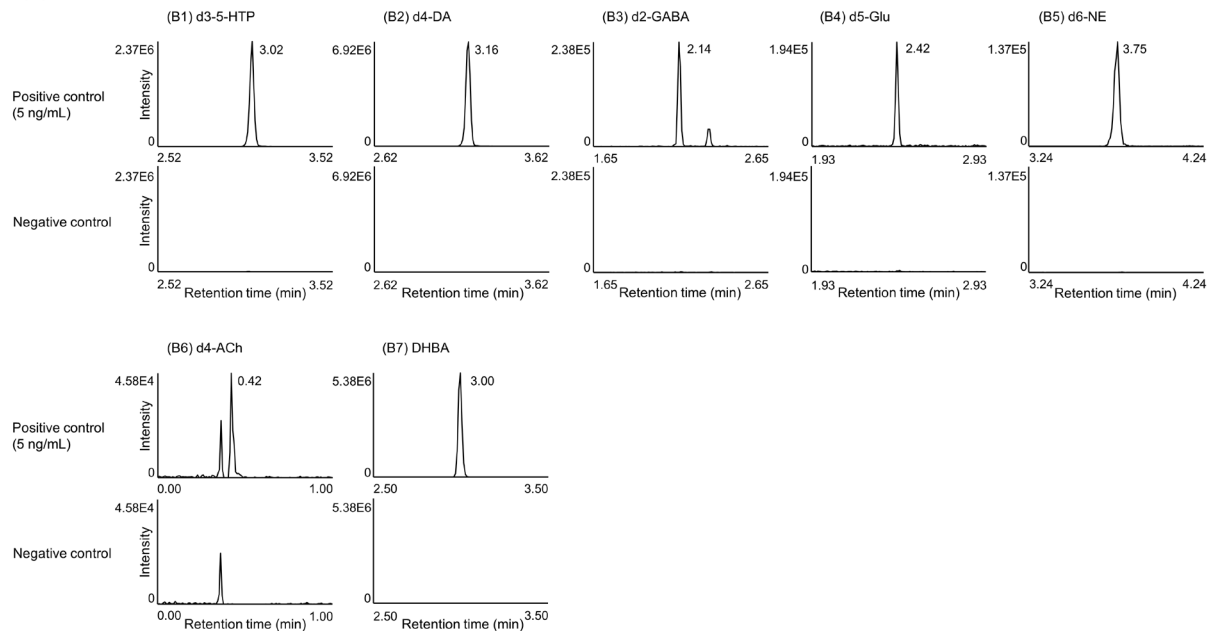

**Figure S5. (continued)**

**Table S3.** Regression equation and linearity (R<sup>2</sup>) of neurochemicals for intra-day calibration

| Compounds | Calibration range (ng/mL) |   |       | Regression equation         | Linearity (R <sup>2</sup> ) |
|-----------|---------------------------|---|-------|-----------------------------|-----------------------------|
| 3-MT      | 0.01                      | – | 1.00  | $y = 0.031050 x + 0.000229$ | 0.9999                      |
| 5-HIAA    | 0.01                      | – | 0.50  | $y = 0.009340 x - 0.000065$ | 0.9992                      |
| 5-HT      | 0.1                       | – | 20.0  | $y = 0.037230 x + 0.000100$ | 0.9998                      |
| 5-HTP     | 0.01                      | – | 1.00  | $y = 0.019750 x + 0.000072$ | 0.9983                      |
| DA        | 0.05                      | – | 2.00  | $y = 0.005905 x + 0.001598$ | 0.9992                      |
| DHPG      | 0.05                      | – | 5.00  | $y = 0.057970 x + 0.000137$ | 0.9988                      |
| DOPAC     | 0.1                       | – | 10.00 | $y = 0.068840 x - 0.000918$ | 0.9990                      |
| EP        | 0.5                       | – | 20.0  | $y = 0.014650 x + 0.001561$ | 0.9994                      |
| GABA      | 5                         | – | 200   | $y = 0.179400 x - 0.021290$ | 0.9979                      |
| Glu       | 10                        | – | 500   | $y = 0.022060 x + 0.020570$ | 0.9973                      |
| HVA       | 0.5                       | – | 20.0  | $y = 0.006306 x + 0.004102$ | 0.9992                      |
| Kyn       | 0.2                       | – | 10.0  | $y = 0.011060 x + 0.000283$ | 0.9997                      |
| L-DOPA    | 0.05                      | – | 2.00  | $y = 0.011160 x + 0.000502$ | 0.9993                      |
| MHPG      | 10                        | – | 500   | $y = 0.002282 x + 0.002352$ | 0.9970                      |
| MN        | 0.2                       | – | 10.0  | $y = 0.024970 x + 0.003019$ | 0.9990                      |
| NE        | 1                         | – | 100   | $y = 0.009220 x - 0.000171$ | 0.9959                      |
| NMN       | 2                         | – | 100   | $y = 0.021000 x + 0.000942$ | 0.9983                      |
| OA        | 2                         | – | 100   | $y = 0.011640 x + 0.001650$ | 0.9986                      |
| TA        | 0.01                      | – | 0.50  | $y = 0.304800 x + 0.006747$ | 0.9996                      |
| Trp       | 1                         | – | 50    | $y = 0.414200 x + 0.024130$ | 0.9996                      |
| Tyr       | 0.2                       | – | 10.0  | $y = 0.015670 x + 0.001227$ | 0.9986                      |
| VMA       | 0.2                       | – | 10.0  | $y = 0.013090 x + 0.001810$ | 0.9982                      |
| ACh       | 5                         | – | 200   | $y = 0.011430 x - 0.011050$ | 0.9992                      |

**Table S4.** Determination of target neurochemical concentrations in an animal model system

| Substance<br>(ng/mL) | Sham (0.0 mA, n = 9) |   |      |           |   |       |            |   |      |            |   |       |
|----------------------|----------------------|---|------|-----------|---|-------|------------|---|------|------------|---|-------|
|                      | Before               |   |      | After 2 h |   |       | After 16 h |   |      | After 24 h |   |       |
| 3-MT                 | 84.4                 | ± | 19.7 | 104.1     | ± | 37.9  | 86.6       | ± | 20.8 | 88.1       | ± | 35.7  |
| 5-HIAA               | 3446                 | ± | 363  | 4993      | ± | 2217  | 3341       | ± | 517  | 3395       | ± | 533   |
| 5-HT                 | 339                  | ± | 26   | 369       | ± | 135   | 331        | ± | 61   | 333        | ± | 56    |
| DA                   | 352                  | ± | 255  | 631       | ± | 344   | 456        | ± | 234  | 161        | ± | 212   |
| DOPAC                | 1383                 | ± | 841  | 2197      | ± | 1270  | 1826       | ± | 923  | 485        | ± | 684   |
| EP                   | 20.9                 | ± | 7.5  | 36.1      | ± | 19.0  | 23.9       | ± | 6.5  | 9.6        | ± | 3.5   |
| GABA                 | 81.4                 | ± | 48.8 | 101.9     | ± | 79.0  | 61.1       | ± | 30.1 | 97.0       | ± | 86.3  |
| Glu                  | 303                  | ± | 203  | 218       | ± | 154   | 291        | ± | 206  | 374        | ± | 361   |
| HVA                  | 3605                 | ± | 778  | 3895      | ± | 1917  | 3771       | ± | 1506 | 3664       | ± | 993   |
| Kyn                  | 169                  | ± | 129  | 185       | ± | 84    | 149        | ± | 65   | 180        | ± | 134   |
| L-DOPA               | 48.5                 | ± | 45.7 | 64.6      | ± | 100.3 | 75.1       | ± | 67.1 | 106.3      | ± | 260.5 |
| MHPG                 | 17.3                 | ± | 6.9  | 34.2      | ± | 19.7  | 18.5       | ± | 5.0  | 9.2        | ± | 3.3   |
| NE                   | 149                  | ± | 45   | 295       | ± | 183   | 143        | ± | 20   | 97         | ± | 70    |
| NMN                  | 117                  | ± | 18   | 188       | ± | 103   | 121        | ± | 26   | 126        | ± | 56    |
| OA                   | 398                  | ± | 260  | 615       | ± | 271   | 479        | ± | 169  | 163        | ± | 200   |
| TA                   | 1209                 | ± | 287  | 1326      | ± | 568   | 1197       | ± | 306  | 1392       | ± | 360   |
| Trp                  | 299                  | ± | 243  | 259       | ± | 259   | 244        | ± | 220  | 246        | ± | 202   |
| VMA                  | 239                  | ± | 54   | 229       | ± | 94    | 246        | ± | 49   | 260        | ± | 113   |

Values are mentioned as mean ± standard deviation

**Table S4.** (continued)

| Substance<br>(ng/mL) | Stimulation (0.1 mA, n = 10) |   |      |           |   |       |            |   |      |            |   |      |
|----------------------|------------------------------|---|------|-----------|---|-------|------------|---|------|------------|---|------|
|                      | Before                       |   |      | After 2 h |   |       | After 16 h |   |      | After 24 h |   |      |
| 3-MT                 | 85.2                         | ± | 22.8 | 85.4      | ± | 39.5  | 88.6       | ± | 23.1 | 78.4       | ± | 19.8 |
| 5-HIAA               | 3560                         | ± | 789  | 4890      | ± | 2120  | 3376       | ± | 989  | 3125       | ± | 1139 |
| 5-HT                 | 311                          | ± | 73   | 371       | ± | 138   | 312        | ± | 90   | 315        | ± | 95   |
| DA                   | 485                          | ± | 268  | 543       | ± | 235   | 552        | ± | 310  | 277        | ± | 263  |
| DOPAC                | 1917                         | ± | 1103 | 1507      | ± | 689   | 1905       | ± | 1043 | 836        | ± | 883  |
| EP                   | 22.7                         | ± | 10.3 | 68.2      | ± | 76.9  | 25.4       | ± | 10.2 | 11.3       | ± | 4.6  |
| GABA                 | 80.4                         | ± | 32.3 | 134.3     | ± | 250.0 | 59.4       | ± | 25.6 | 67.8       | ± | 24.6 |
| Glu                  | 415                          | ± | 270  | 191       | ± | 167   | 321        | ± | 226  | 475        | ± | 355  |
| HVA                  | 3701                         | ± | 718  | 3924      | ± | 1591  | 3728       | ± | 1123 | 3286       | ± | 1211 |
| Kyn                  | 130                          | ± | 95   | 159       | ± | 145   | 187        | ± | 146  | 159        | ± | 110  |
| L-DOPA               | 71.9                         | ± | 95.8 | 23.9      | ± | 38.8  | 66.3       | ± | 70.8 | 32.4       | ± | 32.4 |
| MHPG                 | 18.3                         | ± | 9.0  | 58.9      | ± | 67.7  | 19.0       | ± | 9.7  | 9.0        | ± | 4.4  |
| NE                   | 150                          | ± | 66   | 295       | ± | 205   | 149        | ± | 72   | 107        | ± | 67   |
| NMN                  | 108                          | ± | 30   | 182       | ± | 71    | 109        | ± | 32   | 108        | ± | 30   |
| OA                   | 519                          | ± | 204  | 423       | ± | 268   | 531        | ± | 216  | 262        | ± | 243  |
| TA                   | 1345                         | ± | 297  | 1331      | ± | 833   | 1316       | ± | 404  | 1291       | ± | 451  |
| Trp                  | 239                          | ± | 220  | 157       | ± | 177   | 256        | ± | 383  | 217        | ± | 232  |
| VMA                  | 199                          | ± | 52   | 253       | ± | 89    | 234        | ± | 61   | 218        | ± | 62   |

Values are mentioned as mean ± standard deviation

**Table S4.** (continued)

| Substance<br>(ng/mL) | Stimulation (0.2 mA, n = 10) |   |      |           |   |      |            |   |      |            |   |      |
|----------------------|------------------------------|---|------|-----------|---|------|------------|---|------|------------|---|------|
|                      | Before                       |   |      | After 2 h |   |      | After 16 h |   |      | After 24 h |   |      |
| 3-MT                 | 75.8                         | ± | 29.6 | 93.1      | ± | 27.0 | 85.2       | ± | 25.3 | 83.9       | ± | 37.5 |
| 5-HIAA               | 3081                         | ± | 1035 | 4922      | ± | 2029 | 3353       | ± | 1228 | 3852       | ± | 1467 |
| 5-HT                 | 300                          | ± | 98   | 394       | ± | 87   | 331        | ± | 84   | 356        | ± | 135  |
| DA                   | 464                          | ± | 209  | 621       | ± | 334  | 639        | ± | 206  | 423        | ± | 312  |
| DOPAC                | 1455                         | ± | 715  | 1708      | ± | 963  | 2169       | ± | 852  | 1300       | ± | 1077 |
| EP                   | 28.0                         | ± | 16.7 | 67.5      | ± | 40.1 | 33.1       | ± | 16.7 | 17.2       | ± | 9.8  |
| GABA                 | 53.6                         | ± | 32.3 | 84.3      | ± | 42.7 | 58.0       | ± | 28.4 | 78.9       | ± | 31.9 |
| Glu                  | 389                          | ± | 426  | 300       | ± | 187  | 266        | ± | 217  | 416        | ± | 352  |
| HVA                  | 3326                         | ± | 1105 | 4035      | ± | 1055 | 3701       | ± | 1287 | 4058       | ± | 1597 |
| Kyn                  | 167                          | ± | 139  | 209       | ± | 199  | 193        | ± | 129  | 181        | ± | 141  |
| L-DOPA               | 25.8                         | ± | 22.0 | 17.9      | ± | 19.2 | 60.1       | ± | 47.9 | 33.8       | ± | 31.9 |
| MHPG                 | 24.3                         | ± | 12.2 | 58.9      | ± | 31.9 | 28.7       | ± | 13.9 | 18.3       | ± | 12.4 |
| NE                   | 176                          | ± | 79   | 365       | ± | 168  | 183        | ± | 42   | 160        | ± | 94   |
| NMN                  | 120                          | ± | 40   | 248       | ± | 50   | 125        | ± | 24   | 143        | ± | 57   |
| OA                   | 456                          | ± | 209  | 586       | ± | 207  | 610        | ± | 130  | 382        | ± | 269  |
| TA                   | 1195                         | ± | 372  | 1390      | ± | 473  | 1268       | ± | 410  | 1426       | ± | 497  |
| Trp                  | 233                          | ± | 273  | 171       | ± | 174  | 134        | ± | 97   | 194        | ± | 164  |
| VMA                  | 205                          | ± | 73   | 246       | ± | 84   | 234        | ± | 77   | 242        | ± | 91   |

Values are mentioned as mean ± standard deviation

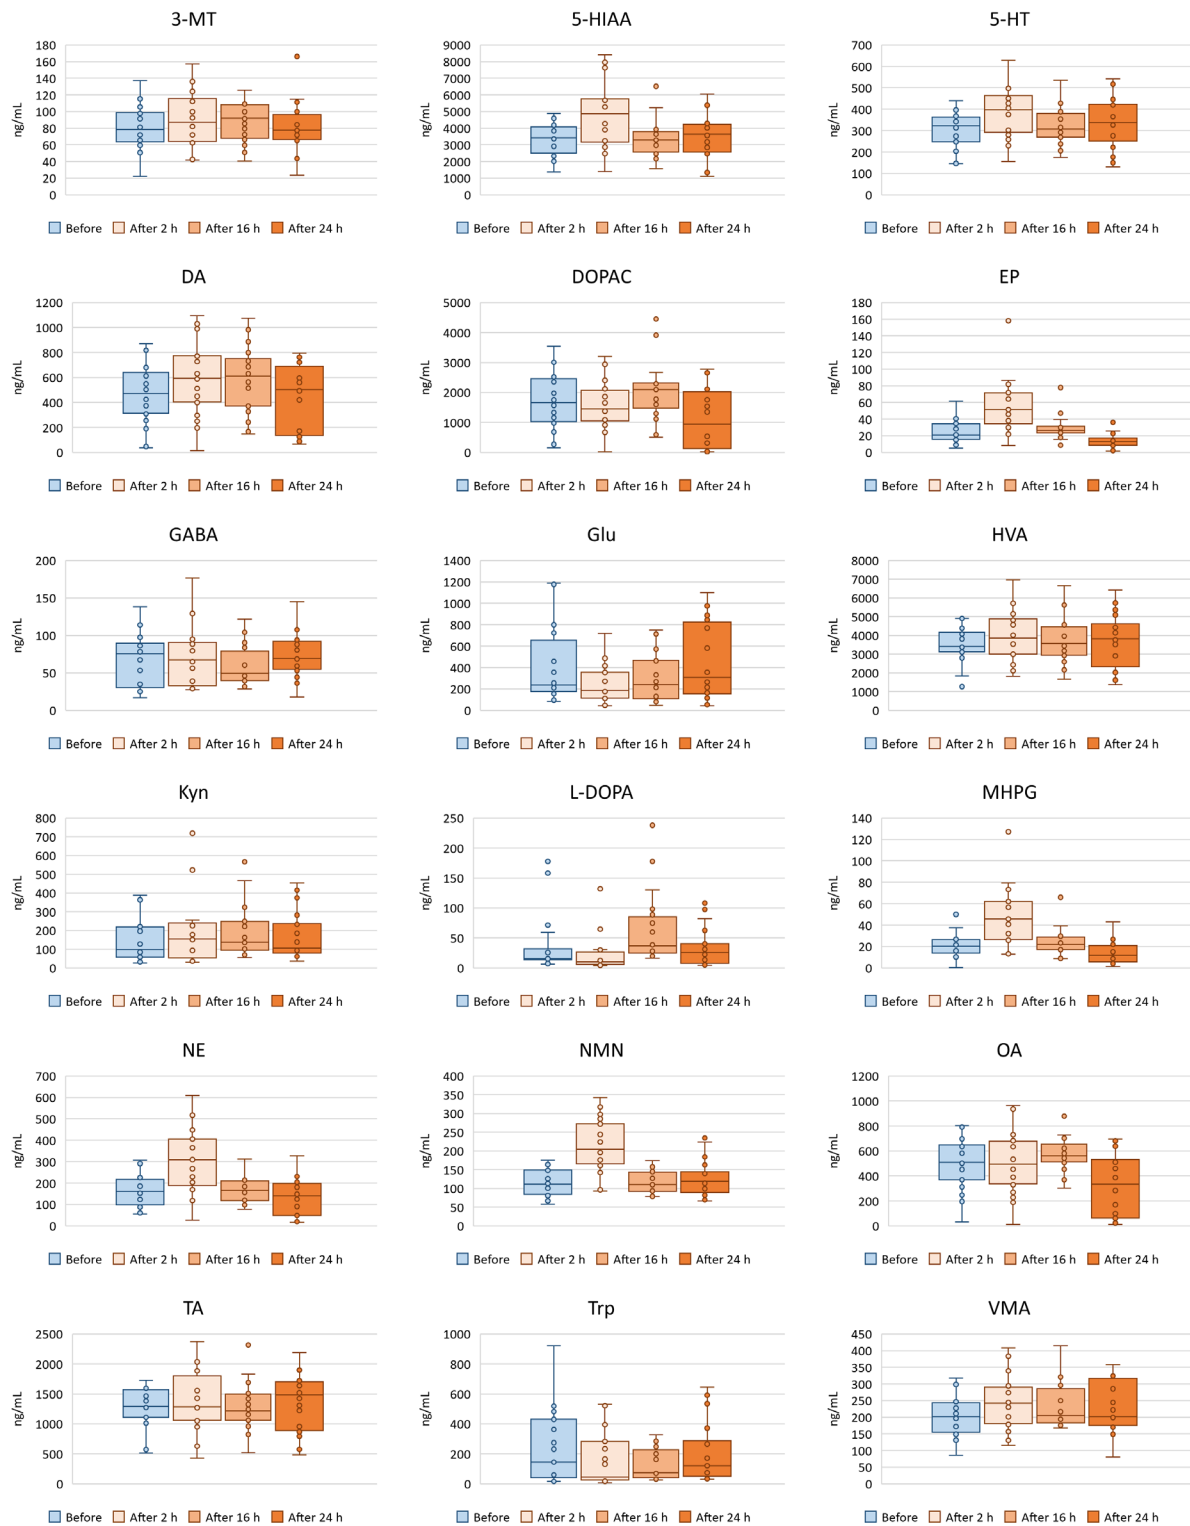

**Figure S6.** Changes in neurochemical concentrations in urine samples collected over time in the stimulation group. Urine was collected a total of four times: before stimulation, after 2 h, 16 h, and 24 h stimulation. The stimulation group included animals that received intensities of tDCS at 0.1 mA and 0.2 mA. All animals performed the exercise immediately before and after the stimulus. Overall, the largest changes in concentration of neurochemicals occurred after 2 hours of stimulation.

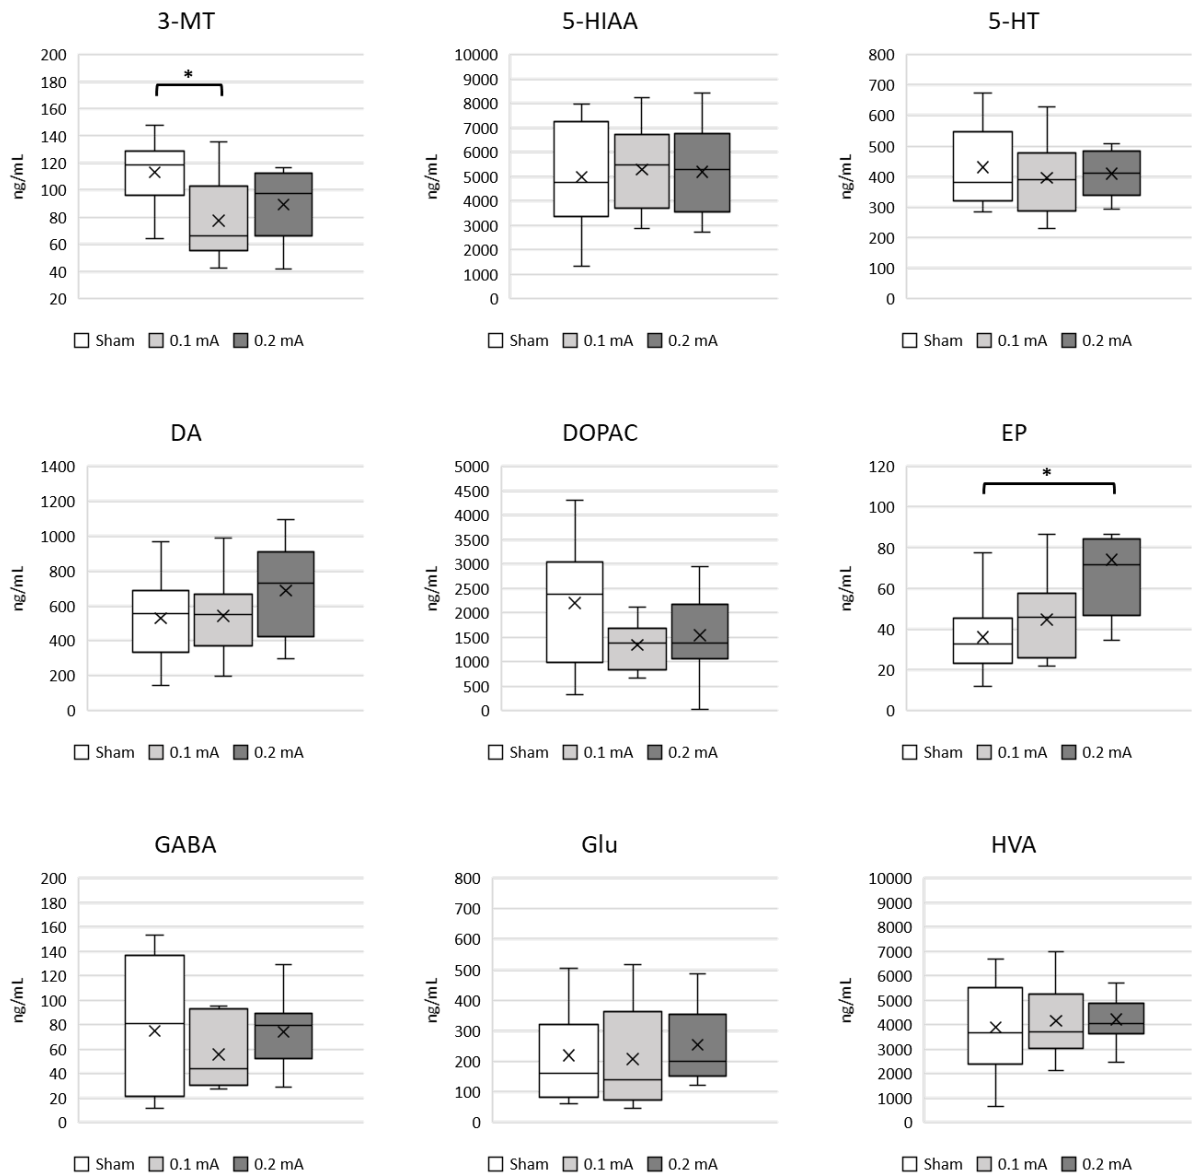

**Figure S7.** Differences in neurochemical concentrations between groups in samples collected 2 hours after stimulation. The Stimulation group included groups with stimulation intensities of 0.1 mA ( $n = 9$ ) and 0.2 mA ( $n = 9$ ), while the Sham group ( $n = 9$ ) received sham stimulation with intensities of 0.0 mA. The stimulation group showed a significant decrease in 3-MT and a significant increase in EP and MHPG compared to the sham group. (\*  $p \leq 0.05$ ).



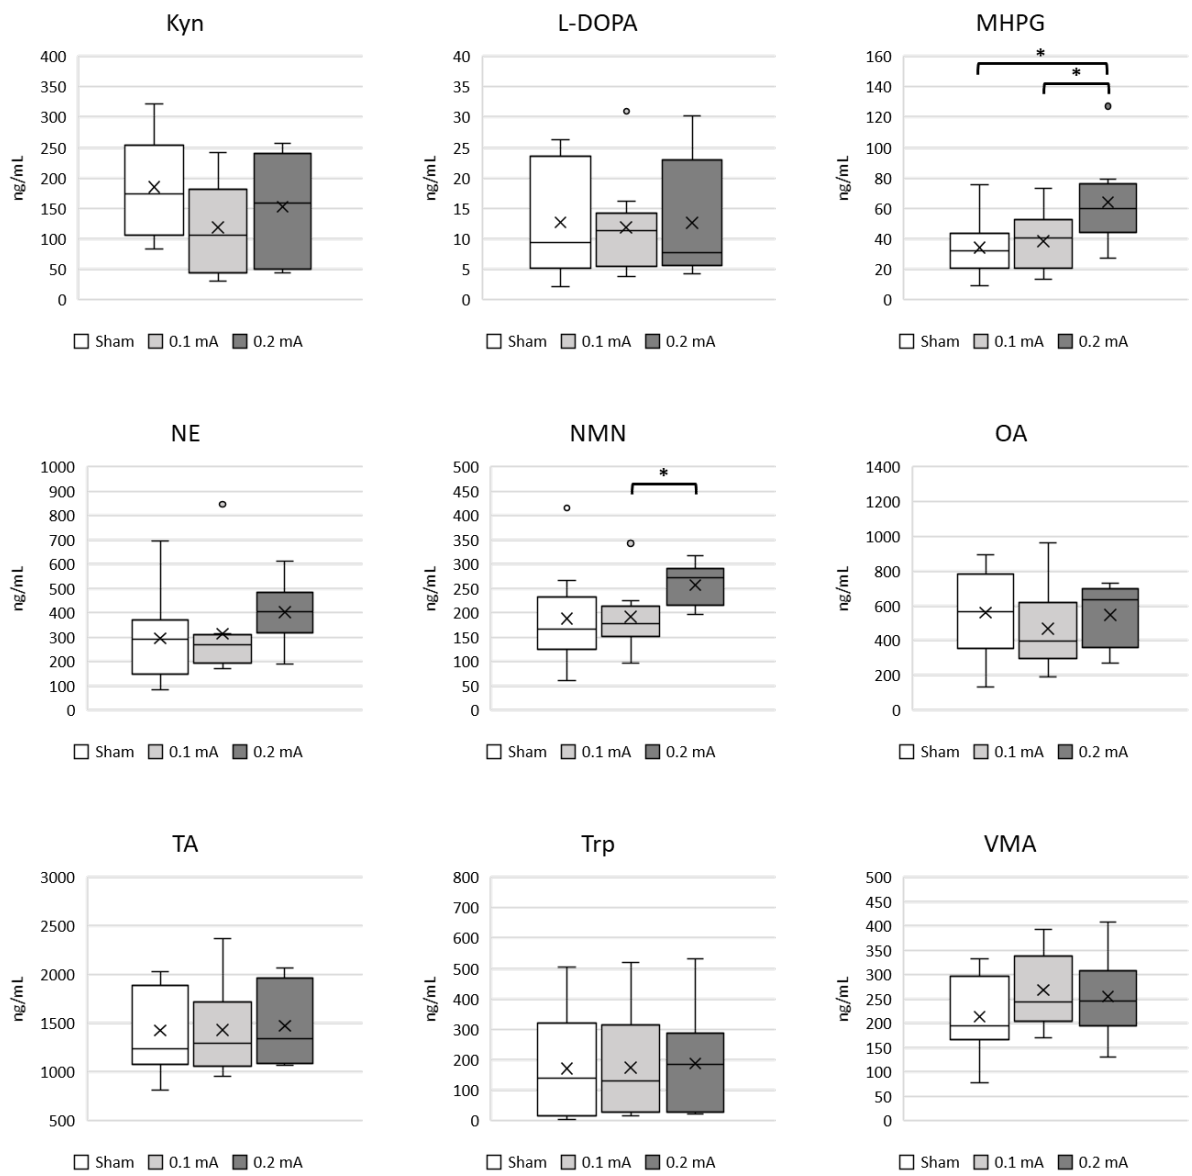

**Figure S7.** (continued)
